# Supplementary material for: FangNet: Mining herb hidden knowledge from TCM clinical effective formulas using structure network algorithm
Source: PubMed Central journal article supplement — Comput Struct Biotechnol J. 2020 Dec 4;19:62–71. doi: 10.1016/j.csbj.2020.11.036 (PMC7753081; doi:10.1016/j.csbj.2020.11.036), 2020-12-04
Supplement: mmc1.pdf [file mmc1.pdf]

## Supplementary Materials

### Mining of 97 abnormal pain prescriptions

For 97 abdominal pain prescriptions, it was found that the top ten herbs in THScore are Gancao, Fuling, Baishao, Danggui, Huanglian, Chaihu, Danshen, Baizhu and Chenpi (Fig. S1A). Gancao has the highest THScore and most related literatures (No.=1371). Traditional Chinese medicine assumes that Gancao can relieve pain. Modern science has proven that Gancao can relieve gastrointestinal smooth muscle spasm and relieve pain [1]. The second-ranked herb is Fuling, which may be related to its sedative effect [1]. The third-ranked herb is Baishao. The mechanism is that Radix Paeoniae Rubra and Gancao have a synergistic analgesic effect on writhing reactions [1].

In the related literature on abdominal pain, Dahuang has the second-highest frequency of occurrence, with a total of 1200, but it is not in the top 10 of THScore. This may be due to the side effects of Dahuang itself, which can easily cause digestive system discomfort [1]. Its clinically applied scope is smaller. After reviewed the literatures and we found that the relevant literatures are mainly about animal experiments. A correlation analysis showed that THScore of top 100 herbs are highly consistent with the number of queried literatures on CNKI using headache and each herb as the keyword( $cor=0.77$ ,  $pvalue<0.0001$ ).

The top 10 of the herb pairs analysis table(Fig. S1B) contains the classic drug pairs of Baishao and Gancao. The main component of Radix Paeoniae Rubra is paeoniflorin, which works synergistically with Gancao, can significantly inhibit the contraction of smooth muscle and skeletal muscle, and has a good antispasmodic and analgesic effect on the pain caused by muscle spasm [2]. The number one Shenqu and Sharen are rarely recorded in the literature. This could be a novel drug pair, synergy mechanism of which deserved to be further explored.

Besides, Among top 10 significant symptoms-herb associations (Fig. S1C), there are more than 2,000 literatures on treatment of rapid pulse by Huangqin. The mechanism is that the sedative effect of Huangqin is reducing heart rate [1,3].

### **Mining of 125 hiccup prescriptions**

For 125 hiccup prescriptions, it was found that the top ten herbs in THScore are Gancao, Chenpi, Renshen, Dingxiang, Banxia, Baizhu, Fuling, Shidi, Muxiang, and Zhuru (Fig. S2A). The first-ranked is Gancao, who has the effect of relieving smooth muscle spasm [1]. The second-ranked is Chenpi, who have been proved to have the effect of relaxing muscles [1]. And the third-ranked is Renshen, which can improve human immunity. TCM assumes that one of the causes of hiccups is frailty, while Renshen has the effect of improve these symptoms[1,4].

In the herb pairs analysis(Fig. S2B), the top-10 herb pairs contain two classic herb pairs: Renshen and Baizhu, Dingxiang and Shidi. TCM assumes that Renshen and Baizhu macrocephala have a synergistic effect, which can improve human immunity, strengthen physique, and achieve the purpose of treating hiccups [5]. The ginsenoside Rg1 contained in Renshen can replenish vitality of spleen and lungs, and can significantly improve the immune function [6]. Baizhu I contained in Baizhu macrocephala is the effective component of invigorating the spleen[7], and Baizhu lactones can inhibit gastrointestinal motility and antispasmodic effects in rats[8]. Traditional Chinese medicine assumes that Dingxiang is an important herb for hiccups. Its active ingredient, volatile oil, can stimulate the secretion of gastric acid and pepsin, there it can help digestion, increase gastrointestinal motility, reduce abdominal distension, and relieve hiccups[9]. The carbohydrate compound contained in Shidi pedicle can inhibit diaphragm contraction and treat hiccups [10].

In the symptom-herb analysis(**Fig. 2C**), the top 10 symptom-herb association include vomiting and Gancao, a total of 1451 related literatures. In addition, Renshen treatment of stomach deficiency [11], Dingxiang treatment of stomach cold [12], all are proved to have mechanism evidence.

## Supplemental Figures

**Figure S1** Cross-validation for abdominal pain prescription mining results. 97 prescriptions of abdominal pain were collected from *Chinese Medicine Prescriptions Dictionary* and *TCM Knowledge Database (Zhong Yi Zhi Ku)*. A: Her importance rank. The left is top 10 THScore-ranked herb. The right are the correlation analysis of THScore and number of literatures for top 100 ranked herb. B. Herb-herb co-occurrence (Co-occurrence Level=4, Co-occurrence event  $\geq 10$ , top 10 ranked by Co\_ratio). C. Symptom-herb associations (Co-occurrence event  $\geq 5$ , top 10 ranked by symptom-herb association).

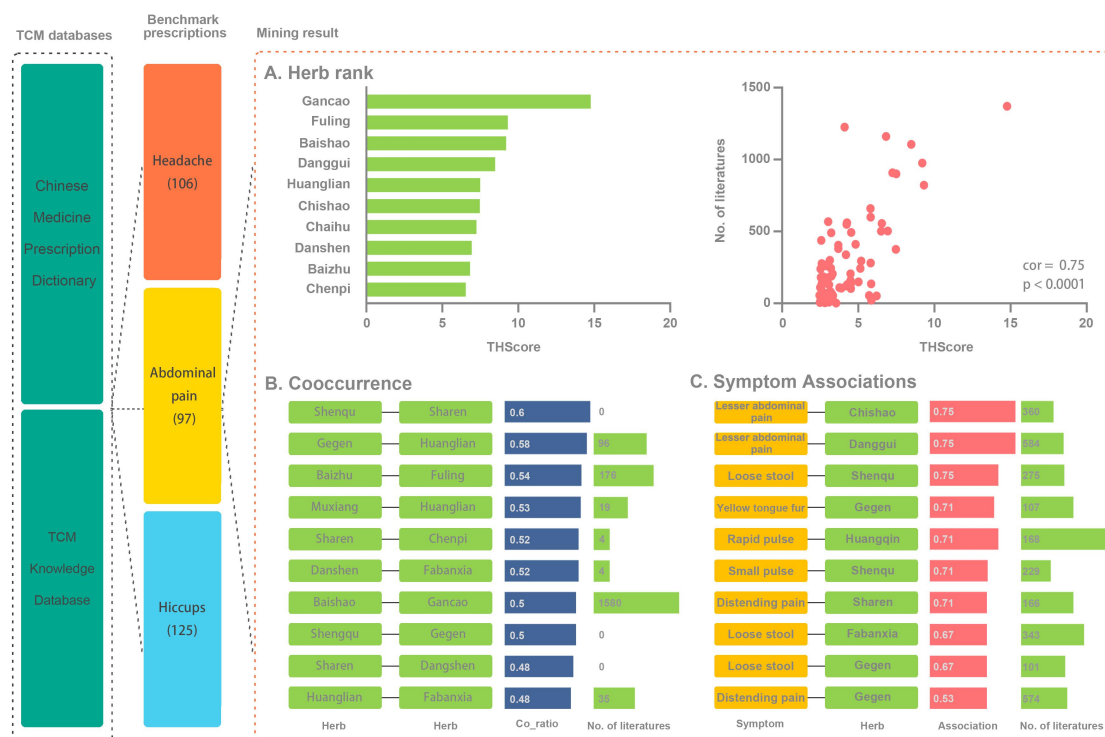

**Figure S2** Cross-validation for hiccups prescription mining results. 125 prescriptions of hiccups were collected from *Chinese Medicine Prescriptions Dictionary* and *TCM Knowledge Database (Zhong Yi Zhi Ku)*. A: Her importance rank. The left is top 10 THScore-ranked herb. The right are the correlation analysis of THScore and number of literatures for top 100 ranked herb. B. Herb-herb co-occurrence (Co-occurrence Level=4, Co-occurrence event  $\geq 10$ , 7 herb-herb pairs are filtered). C. Symptom-herb associations (Co-occurrence event  $\geq 5$ , top 10 ranked by symptom-herb association).

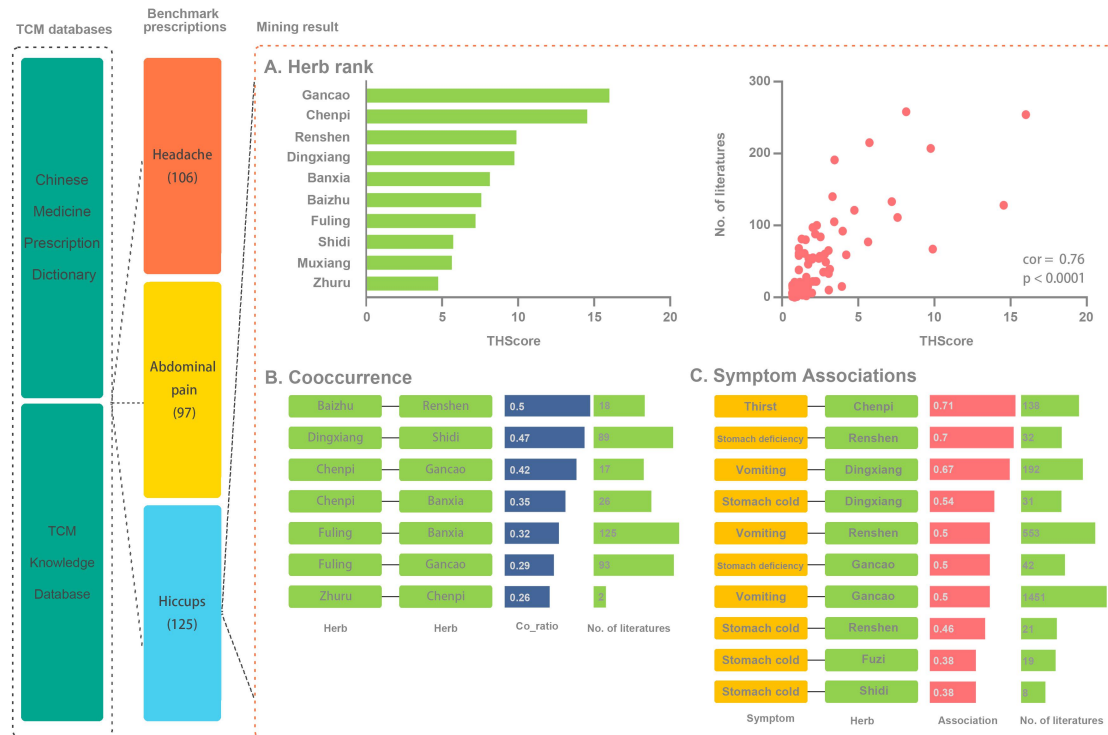

## Supplementary Tables

**Table S1.** Level defined by Co-occurrence ratio and P value.

| Co-occurrence ratio | P value  | Level |
|---------------------|----------|-------|
| [0,0.001]           | [0,0.01] | -4    |
| (0.001,0.002]       | [0,0.01] | -3    |
| (0.002,0.005]       | [0,0.01] | -2    |
| (0.005,0.01]        | [0,0.01] | -1    |
| [0.1,0.15)          | [0,0.01] | 1     |
| [0.15,0.2)          | [0,0.01] | 2     |
| [0.2,0.25)          | [0,0.01] | 3     |
| [0.25,1)            | [0,0.01] | 4     |

**Table S2.** Count and Frequency of the top 10 herb(Headache).

| Herb       | Support | THscore | Dosage_SD | Cooccurrence           | Classification |
|------------|---------|---------|-----------|------------------------|----------------|
| Chuanxiong | 0.63    | 15.27   | 5.18      | Danggui/Baizhi         | driver         |
| Baishao    | 0.42    | 11.59   | 14.85     | Gouteng                | driver         |
| Gancao     | 0.44    | 11.49   | 4.17      | NA                     | driver         |
| Danshen    | 0.26    | 7.55    | 7.63      | Chishao/Quanxie        | driver         |
| Fuling     | 0.26    | 7.41    | 7.34      | Baizhu                 | driver         |
| Tianma     | 0.29    | 7.33    | 2.55      | Duzhong/Gouteng/Zaoren | driver         |
| Gouteng    | 0.24    | 7.09    | 7.66      | Tianma/Baishao         | driver         |
| Danggui    | 0.28    | 7.03    | 2.43      | Chuanxiong /Baizhu     | driver         |
| Shengdi    | 0.28    | 6.83    | 4.41      | NA                     | driver         |
| Juhua      | 0.25    | 6.40    | 2.93      | NA                     | driver         |

**Table S3.12** herb pairs with high level of co-occurrence and mutual exclusivity(Headache).

| Herb1   | Herb2      | Co_ratio | pValue  | Co_event | Ex_event | Total_event | Co_level |
|---------|------------|----------|---------|----------|----------|-------------|----------|
| Danggui | Chuanxiong | 0.42     | 1.6E-05 | 28       | 40       | 68          | 4        |
| Gouteng | Tianma     | 0.40     | 3.4E-05 | 16       | 24       | 40          | 4        |
| Baizhi  | Chuanxiong | 0.34     | 6.7E-05 | 23       | 44       | 67          | 4        |
| Baizhu  | Danggui    | 0.32     | 4.9E-04 | 12       | 25       | 37          | 4        |
| Gouteng | Baishao    | 0.32     | 5.0E-03 | 17       | 36       | 53          | 4        |
| Chishao | Danshen    | 0.32     | 2.0E-03 | 12       | 26       | 38          | 4        |
| Fuling  | Baizhu     | 0.31     | 1.3E-03 | 11       | 25       | 36          | 4        |
| Tianma  | Duzhong    | 0.30     | 2.0E-04 | 10       | 24       | 34          | 4        |

|            |         |      |         |    |    |    |    |
|------------|---------|------|---------|----|----|----|----|
| Zaoren     | Tianma  | 0.29 | 5.7E-04 | 10 | 25 | 35 | 4  |
| Quanxie    | Danshen | 0.28 | 6.1E-03 | 10 | 26 | 36 | 4  |
| Gancao     | Zhuru   | 0    | 4.2E-03 | 0  | 56 | 56 | -4 |
| Chuanxiong | Zhizi   | 0    | 6.5E-03 | 0  | 71 | 71 | -4 |

Table S4. 10 significant associations between symptom and herb(Headache).

| Symptom         | Herb       | Association | Event | Symptom_support | Herb_support |
|-----------------|------------|-------------|-------|-----------------|--------------|
| Tight pulse     | Shengjiang | 0.75        | 6     | 0.75            | 0.22         |
| Palpitation     | Gegen      | 0.71        | 5     | 0.66            | 0.20         |
| Poor sleep      | Juhua      | 0.71        | 5     | 0.66            | 0.25         |
| Flusteredness   | Danshen    | 0.71        | 5     | 0.07            | 0.26         |
| Insomnia        | Shengdi    | 0.67        | 6     | 0.08            | 0.27         |
| Fatigue         | Baishao    | 0.83        | 5     | 0.06            | 0.42         |
| Dry Mouth       | Chaihu     | 0.53        | 8     | 0.14            | 0.20         |
| Distending pain | Gancao     | 0.75        | 6     | 0.08            | 0.44         |
| Tight pulse     | Gancao     | 0.75        | 6     | 0.08            | 0.44         |

Table S5. Count and Frequency of the top 10 herb (abdominal pain).

| Herb      | Support | THScore | Class  | No.of literature |
|-----------|---------|---------|--------|------------------|
| Gancao    | 0.68    | 14.77   | driver | 1,371            |
| Fulin     | 0.42    | 9.32    | driver | 822              |
| Baishao   | 0.42    | 9.21    | driver | 976              |
| Danggui   | 0.27    | 8.49    | driver | 1,106            |
| Huanglian | 0.30    | 7.50    | driver | 901              |
| Choshao   | 0.25    | 7.47    | driver | 376              |
| Chaihu    | 0.30    | 7.25    | driver | 908              |
| Dangshen  | 0.30    | 6.94    | driver | 503              |
| Baizhu    | 0.34    | 6.83    | driver | 1,161            |
| Chenpi    | 0.33    | 6.55    | driver | 556              |

Table S6.10 herb pairs with high level of co-occurrence and mutual exclusivity (abdominal pain).

| Herb1            | Herb2     | pValue | Co_event | Ex_event | Total_event | Level | No.of literature |
|------------------|-----------|--------|----------|----------|-------------|-------|------------------|
| Baishao(Shaoyao) | Gancao    | 0.001  | 29       | 29       | 58          | 4     | 68               |
| Baizhu           | Fulin     | 0.001  | 21       | 18       | 39          | 4     | 176              |
| Gancao           | Gegen     | 0.001  | 17       | 37       | 54          | 4     | 24               |
| Dangshen         | Fulin     | 0.001  | 17       | 23       | 40          | 4     | 10               |
| Muxiang          | Huanglian | 0.001  | 16       | 14       | 30          | 4     | 19               |
| Dangshen         | Baizhu    | 0.001  | 16       | 19       | 35          | 4     | 25               |
| Shenqu           | Gancao    | 0.001  | 16       | 38       | 54          | 4     | 1                |
| chenpi           | Fulin     | 0.01   | 16       | 26       | 42          | 4     | 4                |

|           |           |       |    |    |    |   |     |
|-----------|-----------|-------|----|----|----|---|-----|
| Gegen     | Huanglian | 0.001 | 15 | 11 | 26 | 4 | 96  |
| Huanglian | huangqin  | 0.001 | 15 | 19 | 34 | 4 | 267 |

TableS7. 10 significant associations between symptom and herb (abdominal pain).

| Symptom               | Herb     | Association | Event | Symptom_support | Herb_support | index | No.of literature |
|-----------------------|----------|-------------|-------|-----------------|--------------|-------|------------------|
| lesser abdominal pain | Chishao  | 0.83        | 5     | 0.07            | 0.25         | 0.62  | 18               |
| lesser abdominal pain | Danggui  | 0.83        | 5     | 0.07            | 0.27         | 0.61  | 44               |
| loose stool           | Shenqu   | 0.67        | 6     | 0.10            | 0.20         | 0.53  | 47               |
| yellow tongue fur     | Gegen    | 0.63        | 5     | 0.09            | 0.22         | 0.49  | 105              |
| rapid pulse           | Huangqi  | 0.67        | 8     | 0.13            | 0.32         | 0.46  | 2031             |
| small pulse           | Shenqu   | 0.56        | 9     | 0.17            | 0.20         | 0.45  | 14               |
| distending pain       | Shanren  | 0.56        | 5     | 0.10            | 0.20         | 0.44  | 106              |
| loose stool           | Fabanxia | 0.56        | 5     | 0.10            | 0.22         | 0.44  | 274              |
| loose stool           | Gegen    | 0.56        | 5     | 0.10            | 0.22         | 0.44  | 51               |
| distending pain       | Gegen    | 0.56        | 5     | 0.10            | 0.22         | 0.44  | 61               |

Table S8. Count and Frequency of the top 10 herb (hiccups).

| Herb      | Support | THScore | Class  | No.of literature |
|-----------|---------|---------|--------|------------------|
| Gancao    | 0.48    | 64.04   | driver | 254              |
| Chenpi    | 0.44    | 58.21   | driver | 128              |
| Renshen   | 0.36    | 39.58   | driver | 67               |
| Dingxiang | 0.32    | 39.04   | driver | 207              |
| Banxia    | 0.23    | 32.59   | driver | 258              |
| Baizhu    | 0.23    | 30.31   | driver | 111              |
| Fuling    | 0.20    | 28.83   | driver | 133              |
| Shidi     | 0.20    | 22.94   | driver | 215              |
| Muxiang   | 0.15    | 22.61   | driver | 77               |
| Zhuru     | 0.13    | 19.01   | driver | 121              |

Table S9. 7 herb pairs with high level of co-occurrence and mutual exclusivity (hiccups).

| Herb1  | Herb2   | Co_ratio | pValue | Co_event | Ex_event | Total_event | Level | No.of literature |
|--------|---------|----------|--------|----------|----------|-------------|-------|------------------|
| Baizhu | Renshen | 0.50     | 0.001  | 25       | 25       | 50          | 4     | 18               |

|           |        |      |       |    |    |    |   |     |
|-----------|--------|------|-------|----|----|----|---|-----|
| Dingxiang | Shidi  | 0.47 | 0.001 | 21 | 24 | 45 | 4 | 89  |
| Chenpi    | Gancao | 0.42 | 0.01  | 34 | 47 | 81 | 4 | 17  |
| Chenpi    | Banxia | 0.35 | 0.001 | 22 | 40 | 62 | 4 | 26  |
| Fuling    | Banxia | 0.32 | 0.001 | 13 | 28 | 41 | 4 | 125 |
| Fuling    | Gancao | 0.29 | 0.001 | 19 | 47 | 66 | 4 | 93  |
| Zhuru     | Chenpi | 0.26 | 0.001 | 15 | 42 | 57 | 4 | 2   |

TableS10. 10 significant associations between symptom and herb (hiccups).

| Symptom            | Herb      | Association | Event | Symptom_support | Herb_support | index | No.of literature |
|--------------------|-----------|-------------|-------|-----------------|--------------|-------|------------------|
| Vomiting           | Dingxiang | 0.67        | 8     | 0.10            | 0.32         | 0.45  | 192              |
| Stomach deficiency | Renshen   | 0.70        | 7     | 0.08            | 0.37         | 0.44  | 32               |
| thirst             | Chenpi    | 0.71        | 5     | 0.06            | 0.44         | 0.40  | 138              |
| Stomach cold       | Dingxiang | 0.54        | 7     | 0.10            | 0.32         | 0.37  | 31               |
| Stomach cold       | Fuzi      | 0.38        | 5     | 0.10            | 0.13         | 0.34  | 19               |
| Vomiting           | Renshen   | 0.50        | 6     | 0.10            | 0.37         | 0.32  | 553              |
| Stomach cold       | Shidi     | 0.38        | 5     | 0.10            | 0.21         | 0.30  | 8                |
| Stomach cold       | Renshen   | 0.46        | 6     | 0.10            | 0.37         | 0.29  | 21               |
| Stomach deficiency | Gancao    | 0.50        | 5     | 0.08            | 0.48         | 0.26  | 42               |
| Vomiting           | Gancao    | 0.50        | 6     | 0.10            | 0.48         | 0.26  | 1451             |

Table S11. Count and Frequency of the top 50 herb.

| Herb       | Count | Frequency |
|------------|-------|-----------|
| Danggui    | 2241  | 0.36      |
| Fuling     | 2143  | 0.34      |
| Gancao     | 2119  | 0.34      |
| Baizhu     | 2097  | 0.33      |
| Dangshen   | 1639  | 0.26      |
| Baishao    | 1583  | 0.25      |
| Danshen    | 1555  | 0.25      |
| Chucmxiong | 1416  | 0.23      |
| Chenpi     | 1272  | 0.20      |
| Chaihu     | 1256  | 0.20      |
| Huangqin   | 1242  | 0.20      |
| NA         | 1062  | 0.17      |
| Zhiqiao    | 986   | 0.16      |
| Chishao    | 976   | 0.16      |
| Zhigancao  | 873   | 0.14      |



|            |     |      |
|------------|-----|------|
| Yujin      | 823 | 0.13 |
| Wuweizi    | 815 | 0.13 |
| Ezhu       | 798 | 0.13 |
| Huanglian  | 797 | 0.13 |
| Maidong    | 767 | 0.12 |
| Guizhi     | 717 | 0.11 |
| Sharen     | 715 | 0.11 |
| Jiegeng    | 692 | 0.11 |
| Taoren     | 677 | 0.11 |
| Nuzhenzi   | 664 | 0.11 |
| Taizishen  | 652 | 0.10 |
| Gouqizi    | 636 | 0.10 |
| Yiyiren    | 633 | 0.10 |
| Yuanzhi    | 623 | 0.10 |
| Fangfeng   | 612 | 0.10 |
| Suanzaoren | 598 | 0.10 |
| Honghua    | 595 | 0.09 |
| Xiangfu    | 586 | 0.09 |
| Houpo      | 579 | 0.09 |
| Zexie      | 574 | 0.09 |
| Gegen      | 562 | 0.09 |
| Zhishi     | 533 | 0.08 |
| Lianqicio  | 520 | 0.08 |
| Fabanxia   | 499 | 0.08 |
| Yimucao    | 482 | 0.08 |
| Tusizi     | 463 | 0.07 |
| Pugongying | 459 | 0.07 |
| Zhimu      | 448 | 0.07 |
| Huangbo    | 444 | 0.07 |
| Muli       | 444 | 0.07 |
| Muxiang    | 444 | 0.07 |
| Banxia     | 441 | 0.07 |
| Tianma     | 439 | 0.07 |
| Duzhong    | 425 | 0.07 |

Table S12. 27 herb pairs with high level of co-occurrence and mutual exclusivity

| Herb1   | Herb2    | Interaction | Event        | pValue    | Event_<br>ratio | Clas<br>s | Number in<br>the CNKI |
|---------|----------|-------------|--------------|-----------|-----------------|-----------|-----------------------|
| Honghua | Taoren   | 0.47        | Co_Occurence | 6.86E-296 | 401/459         | 4         | 74                    |
| Baizhu  | Fuling   | 0.37        | Co_Occurence | 1.08E-129 | 1116/1917       | 4         | 175                   |
| Baizhu  | Dangshen | 0.33        | Co_Occurence | 2.61E-138 | 856/1737        | 4         | 25                    |

|            |            |      |                    |           |          |    |     |
|------------|------------|------|--------------------|-----------|----------|----|-----|
| Maidong    | Wuweizi    | 0.31 | Co_Occurence       | 4.69E-161 | 378/824  | 4  | 5   |
| Chucmxiong | Danggui    | 0.31 | Co_Occurence       | 2.45E-120 | 791/1759 | 4  | 195 |
| Gouqizi    | Nuzhenzi   | 0.29 | Co_Occurence       | 3.08E-133 | 247/609  | 4  | 3   |
| Tusizi     | Shudihuang | 0.29 | Co_Occurence       | 9.16E-117 | 170/423  | 4  | 3   |
| Chucmxiong | Honghua    | 0.28 | Co_Occurence       | 7.16E-174 | 426/1080 | 4  | 28  |
| Fuling     | Chenpi     | 0.28 | Co_Occurence       | 1.01E-86  | 729/1914 | 4  | 4   |
| Baishao    | Danggui    | 0.27 | Co_Occurence       | 2.74E-57  | 765/2051 | 4  | 25  |
| Chenpi     | Baizhu     | 0.27 | Co_Occurence       | 7.84E-77  | 696/1915 | 4  | 11  |
| Tusizi     | Gouqizi    | 0.27 | Co_Occurence       | 9.40E-111 | 186/515  | 4  | 2   |
| Fuling     | Shanyao    | 0.26 | Co_Occurence       | 1.43E-96  | 646/1850 | 4  | 18  |
| Taoren     | Chuanxiong | 0.25 | Co_Occurence       | 2.95E-125 | 407/1193 | 4  | 11  |
| Yuanzhi    | Suanzaoren | 0.25 | Co_Occurence       | 1.96E-106 | 245/721  | 4  | 9   |
| Dangshen   | Fuling     | 0.25 | Co_Occurence       | 8.22E-48  | 704/2106 | 4  | 8   |
| Danggui    | Baizhu     | 0.25 | Co_Occurence       | 1.58E-19  | 810/2424 | 4  | 28  |
| Banxia     | Fabanxia   | 0.00 | Mutually_Exclusive | 7.54E-17  | 0/939    | -4 | 1   |
| Jinei jin  | Shudihuang | 0.00 | Mutually_Exclusive | 3.14E-09  | 0/696    | -4 | 0   |
| Zhizi      | Zhishi     | 0.00 | Mutually_Exclusive | 1.93E-12  | 1/873    | -3 | 0   |
| Xiakucao   | Fabanxia   | 0.00 | Mutually_Exclusive | 1.56E-11  | 1/836    | -3 | 0   |
| Yimucao    | Muxiang    | 0.00 | Mutually_Exclusive | 5.84E-11  | 1/804    | -3 | 0   |
| Chuanniuxi | Muxiang    | 0.00 | Mutually_Exclusive | 1.68E-09  | 1/761    | -3 | 0   |
| Dilong     | Jiangcan   | 0.00 | Mutually_Exclusive | 1.51E-08  | 1/721    | -3 | 0   |
| Huangjing  | Tusizi     | 0.00 | Mutually_Exclusive | 3.16E-08  | 1/705    | -3 | 0   |
| Bajitian   | Rougui     | 0.00 | Mutually_Exclusive | 7.48E-08  | 1/695    | -3 | 0   |
| Xiakucao   | Rougui     | 0.00 | Mutually_Exclusive | 8.47E-07  | 1/644    | -3 | 1   |

Table S13. 76 significant associations between symptom and herb

| Symptom | Herb | Symptom_<br>count | Herb_<br>count | Symptom_<br>herb_count | Ratio |
|---------|------|-------------------|----------------|------------------------|-------|
|---------|------|-------------------|----------------|------------------------|-------|

|                          |             |    |      |    |      |
|--------------------------|-------------|----|------|----|------|
| Thin Nasal Secretion     | Jiegeng     | 33 | 692  | 20 | 0.61 |
| Nasal Obstruction        | Jiegeng     | 33 | 692  | 20 | 0.61 |
| Rhinocnesmus             | Jiegeng     | 33 | 692  | 20 | 0.61 |
| Purulent Nasal Discharge | Chaihu      | 51 | 1256 | 33 | 0.65 |
| Purulent Nasal Discharge | Huangqin    | 51 | 1242 | 33 | 0.65 |
| Purulent Nasal Discharge | Dilong      | 51 | 364  | 31 | 0.61 |
| Purulent Nasal Discharge | Baizhi      | 51 | 312  | 36 | 0.71 |
| Epistaxis                | Chaihu      | 51 | 1256 | 33 | 0.65 |
| Epistaxis                | Huangqin    | 51 | 1242 | 33 | 0.65 |
| Epistaxis                | Dilong      | 51 | 364  | 31 | 0.61 |
| Epistaxis                | Baizhi      | 51 | 312  | 36 | 0.71 |
| Sputum                   | Huangqin    | 61 | 1242 | 50 | 0.82 |
| Sputum                   | Qingbanxia  | 61 | 247  | 44 | 0.72 |
| Sputum                   | Gualou      | 61 | 305  | 45 | 0.74 |
| Sputum                   | Dilong      | 61 | 364  | 49 | 0.80 |
| Sputum                   | Zisuzi      | 61 | 83   | 49 | 0.80 |
| Sputum                   | Qianhu      | 61 | 204  | 46 | 0.75 |
| Sputum                   | Kuandonghua | 61 | 96   | 44 | 0.72 |
| Sputum                   | Baiqian     | 61 | 124  | 45 | 0.74 |
| Dyspnea                  | Huangqin    | 61 | 1242 | 50 | 0.82 |
| Dyspnea                  | Qingbanxia  | 61 | 247  | 44 | 0.72 |
| Dyspnea                  | Gualou      | 61 | 305  | 45 | 0.74 |
| Dyspnea                  | Dilong      | 61 | 364  | 49 | 0.80 |
| Dyspnea                  | Zisuzi      | 61 | 83   | 49 | 0.80 |
| Dyspnea                  | Qianhu      | 61 | 204  | 46 | 0.75 |
| Dyspnea                  | Kuandonghua | 61 | 96   | 44 | 0.72 |
| Dyspnea                  | Baiqian     | 61 | 124  | 45 | 0.74 |
| Neck Pain                | Danggui     | 41 | 2241 | 34 | 0.83 |
| Neck Pain                | Danshen     | 41 | 1555 | 34 | 0.83 |
| Neck Pain                | Xiangfu     | 41 | 586  | 30 | 0.73 |
| Neck Pain                | Gancao      | 41 | 2119 | 30 | 0.73 |
| Neck Pain                | Tianma      | 41 | 439  | 33 | 0.80 |
| Neck Pain                | Guizhi      | 41 | 717  | 31 | 0.76 |
| Neck Pain                | Gegen       | 41 | 562  | 32 | 0.78 |
| Neck Pain                | Zexie       | 41 | 574  | 31 | 0.76 |
| Neck Pain                | Jianghuang  | 41 | 94   | 30 | 0.73 |
| Neck Pain                | Chishao     | 41 | 976  | 35 | 0.85 |
| Lumbodynia               | Tufuling    | 94 | 305  | 60 | 0.64 |
| Lumbodynia               | Baimaogen   | 94 | 189  | 65 | 0.69 |
| Fatigue                  | TUfuling    | 94 | 305  | 60 | 0.64 |
| Fatigue                  | Baimaogen   | 94 | 189  | 65 | 0.69 |
| Facial Paralysis         | Dangshen    | 54 | 1639 | 47 | 0.87 |
| Facial Paralysis         | Lianqiao    | 54 | 520  | 45 | 0.83 |

|                                                         |            |     |      |     |      |
|---------------------------------------------------------|------------|-----|------|-----|------|
| Facial Paralysis                                        | Huangqin   | 54  | 1242 | 46  | 0.85 |
| Facial Paralysis                                        | Banlangen  | 54  | 102  | 45  | 0.83 |
| Facial Paralysis                                        | Quanxie    | 54  | 293  | 48  | 0.89 |
| Facial Paralysis                                        | Jiangcan   | 54  | 373  | 46  | 0.85 |
| Facial Paralysis                                        | Baifuzi    | 54  | 63   | 43  | 0.80 |
| Facial Paralysis                                        | Jinyinhua  | 54  | 271  | 45  | 0.83 |
| Facial Paralysis                                        | Daqingye   | 54  | 80   | 46  | 0.85 |
| Facial Paralysis                                        | Xixin      | 54  | 189  | 46  | 0.85 |
| Pain                                                    | Fuling     | 356 | 2143 | 253 | 0.71 |
| Pain                                                    | Shanyao    | 356 | 1062 | 245 | 0.69 |
| Peaud Orange                                            | Baizhu     | 242 | 2097 | 150 | 0.62 |
| Peaud Orange                                            | Fuling     | 242 | 2143 | 208 | 0.86 |
| Peaud Orange                                            | Shanyao    | 242 | 1062 | 209 | 0.86 |
| Breast Pain                                             | Jiegeng    | 33  | 692  | 28  | 0.85 |
| Breast Pain                                             | Zaojiaoci  | 33  | 106  | 22  | 0.67 |
| Poor Milk Discharge                                     | Jiegeng    | 33  | 692  | 28  | 0.85 |
| Poor Milk Discharge                                     | Zaojiaoci  | 33  | 106  | 22  | 0.67 |
| Headache                                                | Chuanxiong | 113 | 1416 | 90  | 0.80 |
| Flaccidity of Muscles                                   | Danggui    | 177 | 2241 | 142 | 0.80 |
| Flaccidity of Muscles                                   | Chenqi     | 177 | 1272 | 132 | 0.75 |
| Flaccidity of Muscles                                   | Fangfeng   | 177 | 612  | 107 | 0.60 |
| Increased frequency of defecation: Increased defecation | Baizhu     | 56  | 2097 | 37  | 0.66 |
| Loose Stool                                             | Baizhu     | 56  | 2097 | 37  | 0.66 |
| Failing to sleep due to dyspnea: Insomnia               | Danshen    | 250 | 1555 | 151 | 0.60 |
| Lumbodynia                                              | Danshen    | 82  | 1555 | 52  | 0.63 |
| Lumbodynia                                              | Jixueteng  | 82  | 328  | 52  | 0.63 |
| Lumbodynia                                              | Duzhong    | 82  | 425  | 58  | 0.71 |
| Maculopapules                                           | Gancao     | 42  | 2119 | 26  | 0.62 |
| Maculopapules                                           | Difuzi     | 42  | 137  | 26  | 0.62 |
| Depression                                              | Baizhu     | 49  | 2097 | 33  | 0.67 |
| Depression                                              | Danggui    | 49  | 2241 | 34  | 0.69 |
| Depression                                              | Fuling     | 49  | 2143 | 34  | 0.69 |
| Depression                                              | Gancao     | 49  | 2119 | 32  | 0.65 |

## References

[1]X.M.Gao, *Pharmacy*.Beijing: China Press of Traditional Chinese Medicine Col.Lid, 2007. ; p.433,250,212,463,158[Chinese].

- [2]D.Z.Li.*The first prescription for relieving spasm and pain: Shaoyao Gancao Decoction*.Jiangsu Health Care,2020(08): p.33[Chinese].
- [3]Y.N.Yuan,N.Wang,H.Y.Wang,et al.*Screening of effective components for sedative effect of Scutellaria baicalensis Georgi*.Journal of Harbin University of Commerce : Natural Sciences Edition,2016,32(02): p.132-135[Chinese].
- [4]Z.Y.Zhou, *Internal Medicine of Traditional Chinese Medicine*, Beijing: China Press of Traditional Chinese Medicine Col.Lid,2010: p.221[Chinese].
- [5]H.Y.Wang.*Analysis on the Function of Renshen Medicine*.Chinese Archives of Traditional Chinese Medicine,2009,27(03): p.649-651[Chinese].
- [6]Y.Wang, Y.Jang, B.X.Wang.*Effects of ginsenoside Rg1 and its intestinal bacteria metabolite Rh1 on immune cell function in mice*.Acta Pharmaceutical Sinica, 2002, 37 (12) :p.927[Chinese].
- [7]X.P.Chen,C.L.Zhang.*Survey of research on pharmacological effects of different chemical components of Baizhu macrocephala*.Information on Traditional Chinese Medicine,2011,28(02): p.124-126[Chinese].
- [8]Y.Q.Zhang, S.B.Xu, Y.C.Lin.*The gastrointestinal inhibitory effect of Baizhu series*.Journal of Chinese Medicinal Materials, 1999, 22 (12) : p.636-640[Chinese].
- [9] L.L.Yang.*Dingxiang oil massage Zhongwan point for hiccup*.Shanxi Journal of Traditional Chinese Medicine, 2005, 21 (6) : p.15[Chinese].
- [10]X.X.Wei,R.Ma,H.Liu,et al.*General Situation of Pharmaceutical Research on Shidi*,2013,41(10): p.4329-4330[Chinese].
- [11]J.Y.Xu. *Study on the Effect of Dajianzhong Decoction and Its Separate Prescriptions on Rats with Spleen-Stomach Deficiency and Gastric Ulcer*.Heilongjiang University Of Chinese Medicine,2020[Chinese].
- [12]*Lilac-the king of healing hiccups*.Chinese Medicine Modern Distance Education of China,2013,11(20): p.148[Chinese].
